# Supplementary material
Source: PubMed Central journal article supplement (PMC8900000)
Supplement: ajcr0012-0793-f7.pdf [file ajcr0012-0793-f7.pdf]

## H2AX mRNA expression in breast cancer

**Table S1.** Sequence of shRNA for H2AX

|              | Clone ID           | Target Sequence        |
|--------------|--------------------|------------------------|
| Human shH2AX | pGIPZ_V2LHS_191495 | CCGTTGGCTTCTGAACTGGAAT |
| Mouse shH2AX | TRC_TRCN0000097005 | CGAGTACCTCACTGCCGAGAT  |

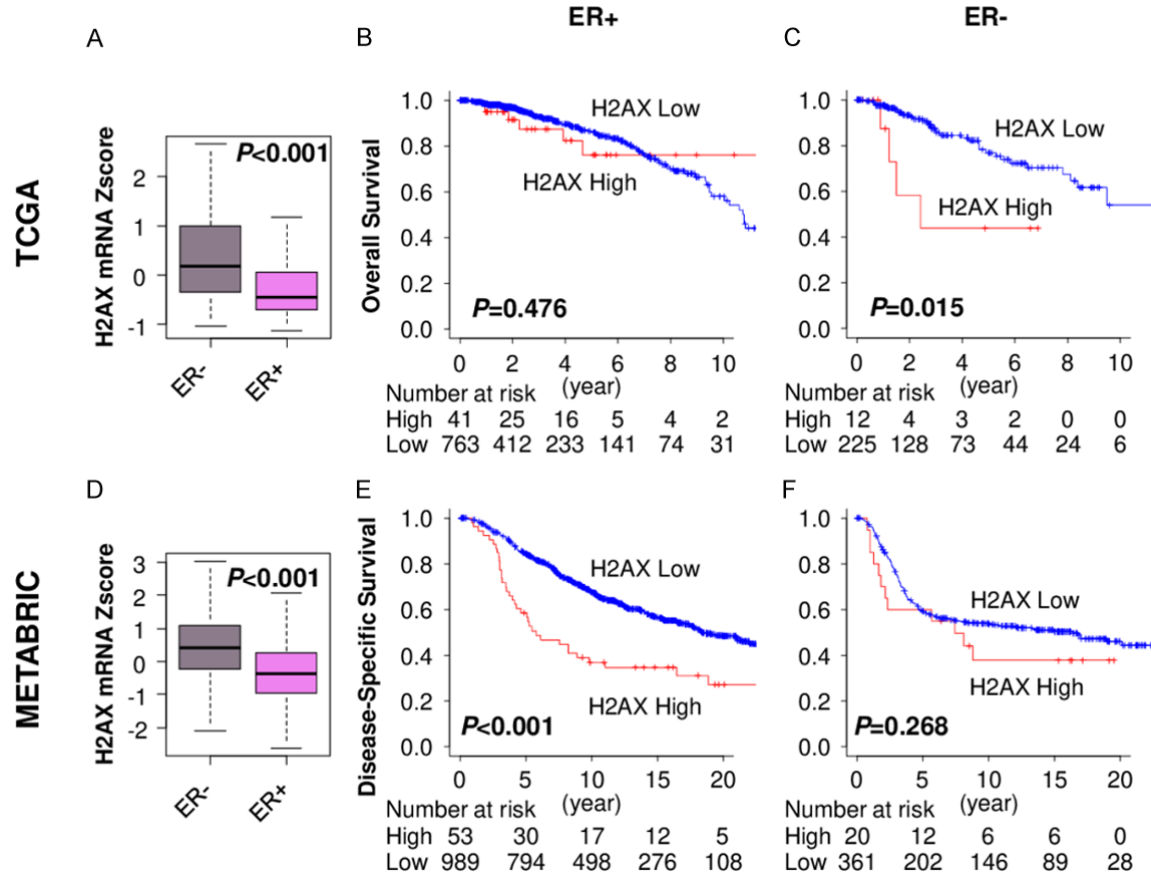

**Figure S1.** Impact of H2AX expression on breast cancer patient survival by ER status. (A) H2AX expression comparison between ER+ (n=804) and ER- (n=237) breast cancers in TCGA. Overall survival by H2AX expression in (B) ER+ (n=804) and (C) ER- (n=237) TCGA breast cancer cohort. (D) H2AX expression comparison between ER+ (n=1042) and ER- (n=381) breast cancers in METABRIC. Disease-specific survival by H2AX expression in (E) ER+ (n=1042) and (F) ER- (n=381) METABRIC cohort.

## H2AX mRNA expression in breast cancer

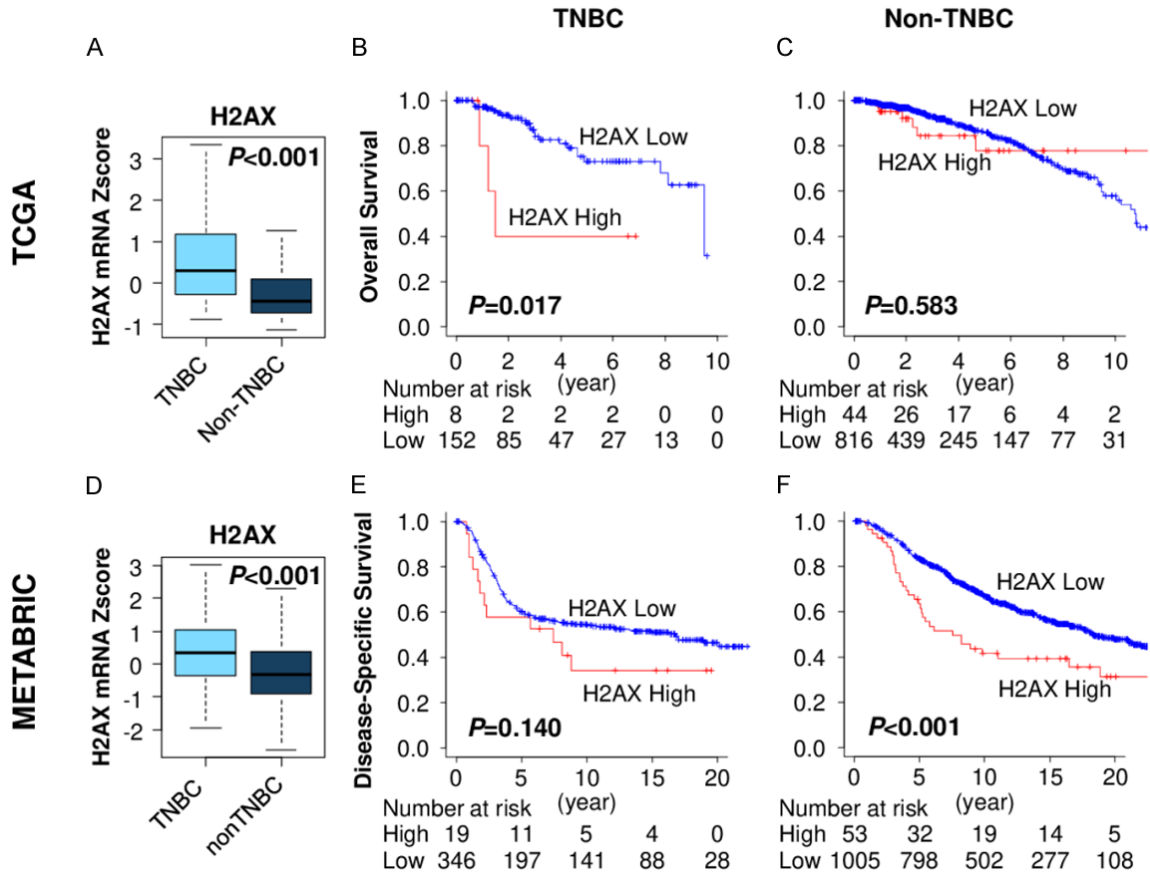

**Figure S2.** Impact of H2AX expression on breast cancer patient survival in triple-negative breast cancer (TNBC). (A) H2AX expression comparison between TNBC (n=160) and non-TNBC (n=860) breast cancers in TCGA. Overall survival by H2AX expression in (B) TNBC (n=160) and (C) non-TNBC (n=860) TCGA breast cancer cohort. (D) H2AX expression comparison between TNBC (n=365) and non-TNBC (n=1058) breast cancers in METABRIC. Disease-specific survival by H2AX expression in (E) TNBC (n=365) and (F) non-TNBC (n=1058) METABRIC cohort.

## H2AX mRNA expression in breast cancer

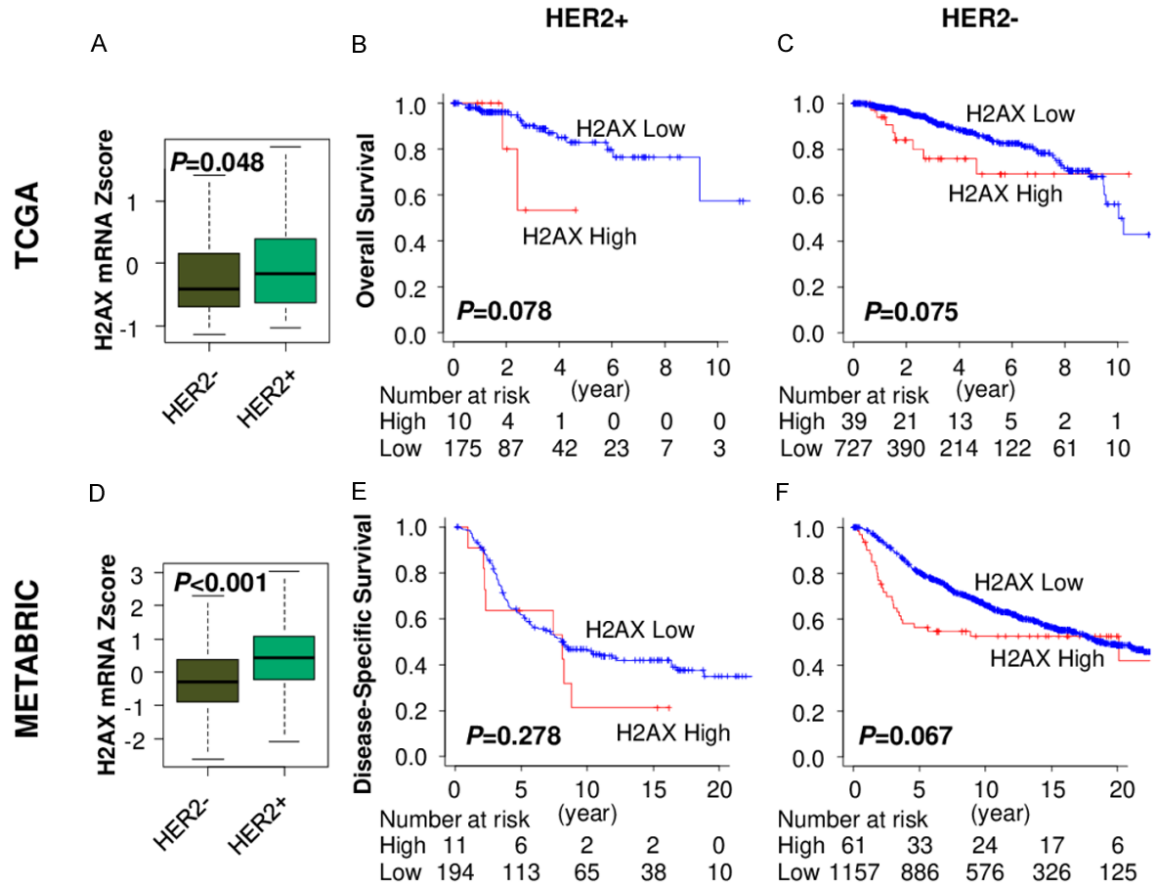

**Figure S3.** Impact of H2AX expression on breast cancer patient survival by HER2 status. (A) H2AX expression comparison between HER2+ (n=185) and HER2- (n=766) breast cancers in TCGA. Overall survival by H2AX expression in (B) HER2+ (n=185) and (C) HER2- (n=766) TCGA breast cancer cohort. (D) H2AX expression comparison between HER2+ (n=205) and HER2- (n=1218) breast cancers in METABRIC. Disease-specific survival by H2AX expression in (E) HER2+ (n=205) and (F) HER2- (n=1218) METABRIC cohort.

## H2AX mRNA expression in breast cancer

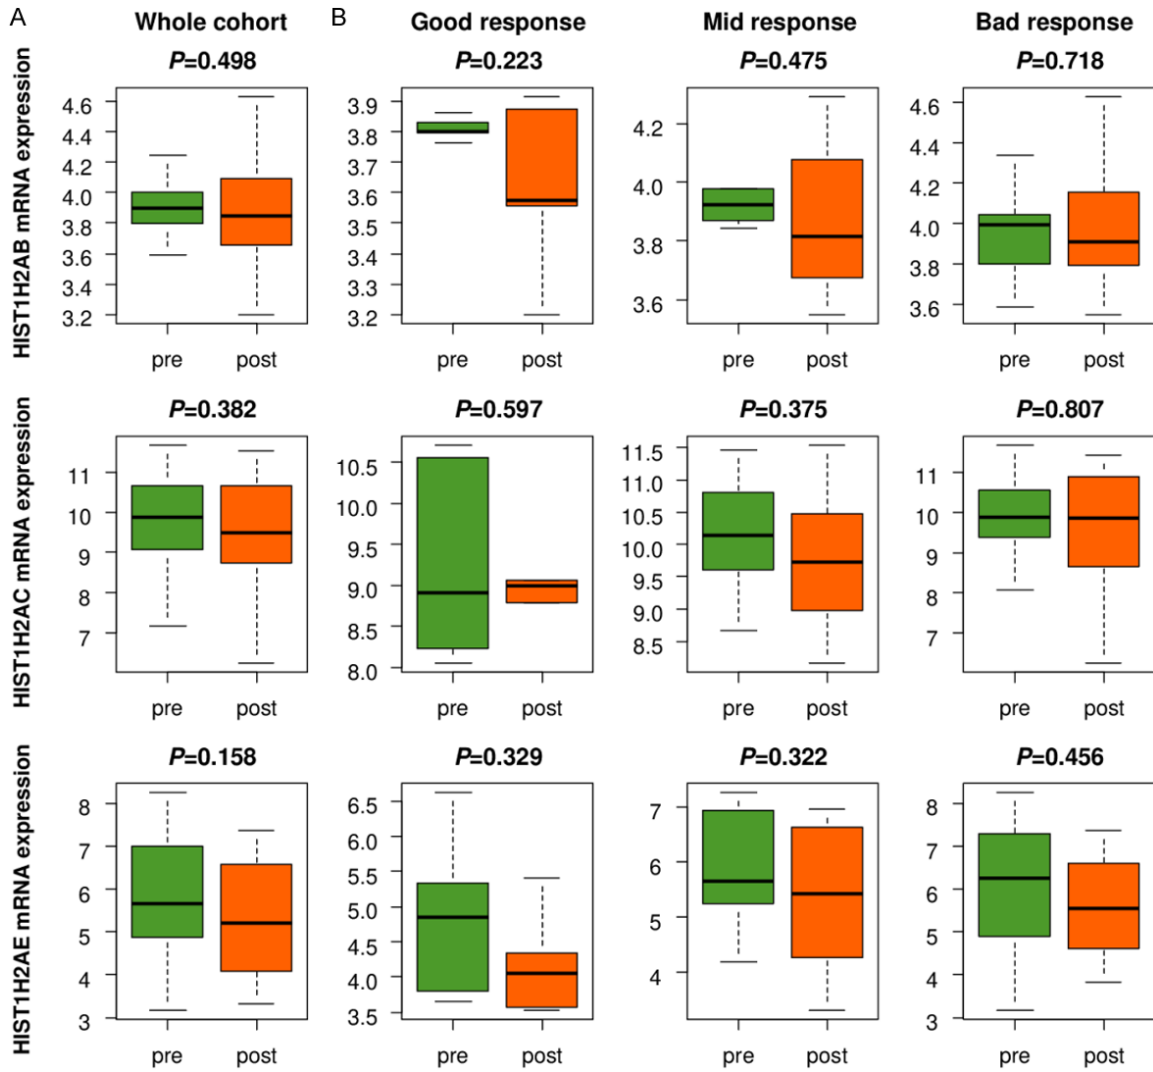

**Figure S4.** The association of other H2A1 coding genes and chemotherapy in breast cancer. H2A1 coding gene expression comparison between pre- and post-chemotherapy tumors in (A) whole cohort (n=28), (B) good (n=5), mid (n=10), and bad (n=13) response group in GSE28844 breast cancer cohort.

## H2AX mRNA expression in breast cancer

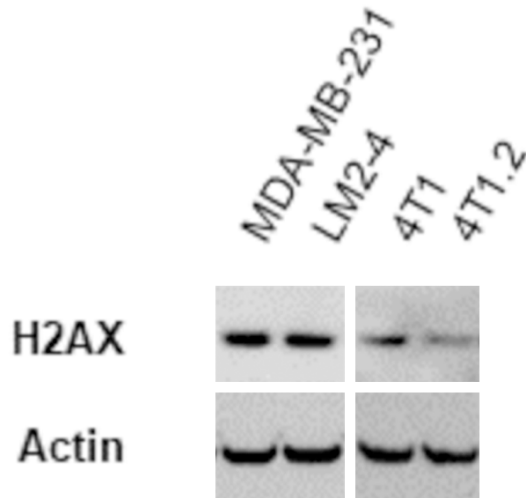

**Figure S5.** Immunoblot of H2AX and Actin in MDA-MB-231 and its metastatic clone, LM2-4, as well as 4T1 and its metastatic line 4T1.2.

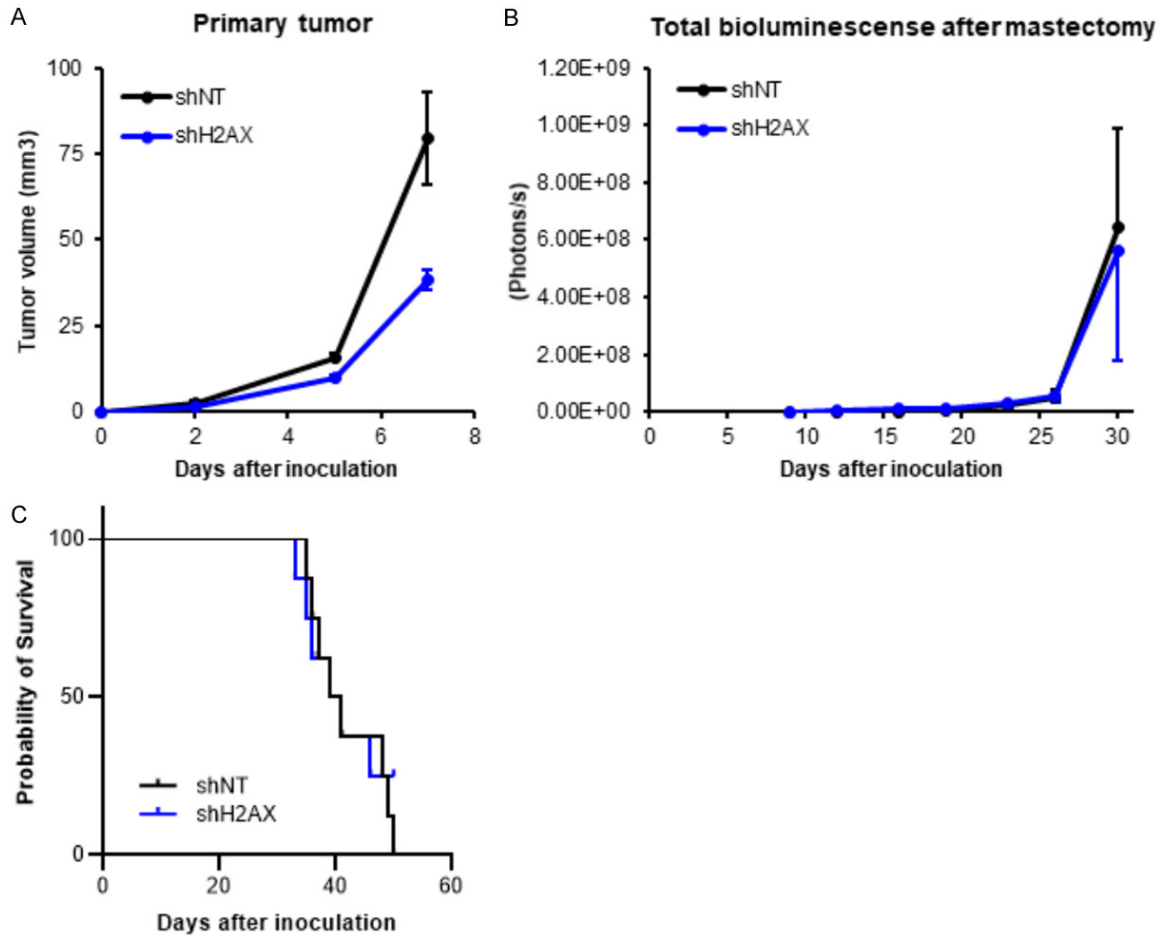

**Figure S6.** H2AX knockdown 4T1 syngeneic tumor with mastectomy. A. Primary tumor growth before mastectomy. B. Total bioluminescence after mastectomy. C. Survival curve of mice (n=8, each group).
